# Supplementary material for: Advancing Cancer Therapy Predictions with Patient-Derived Organoid Models of Metastatic Breast Cancer
Source: MDPI journal article supplement (doi:10.3390/cancers15143602), 2023-07-13
Supplement: s1 [file s1]

# Supplementary Materials: Advancing Cancer Therapy Predictions with Patient-Derived Organoid Models of Metastatic Breast Cancer

Cansu E. Önder, Teresa J. Ziegler, Ronja Becker, Sara Y. Brucker, Andreas D. Hartkopf, Tobias Engler, André Koch

**Table S1.** List of BC patient data from whom the organoid lines were established. All patients were female aged between 52 and 79. Abbreviations: ILC (invasive lobular carcinoma), NST (no special type).

| MBC-PDO                          | #02                                                    | #03                                                                                    | #04                                             | #05                                                                                                                        | #06                                                                                | #07                                                            |
|----------------------------------|--------------------------------------------------------|----------------------------------------------------------------------------------------|-------------------------------------------------|----------------------------------------------------------------------------------------------------------------------------|------------------------------------------------------------------------------------|----------------------------------------------------------------|
| <b>Primary tumor</b>             | ILC (1993)                                             | NST (2008)                                                                             | NST (2009)                                      | ILC (2013)                                                                                                                 | NST (2019)                                                                         | NST (2019)                                                     |
| <b>Therapy of primary tumor</b>  | No adjuvant drug therapy                               | Trastuzumab; Aromasin; Carboplatin; Taxol; Avastin (until 2019)                        | FEC + Docetaxel; Tamoxifen (until 2013)         | Not known                                                                                                                  | Epirubicin/Cyclophosphamide (aborted)                                              | Doxorubicin                                                    |
| <b>Metastasis</b>                | Uterus and peritoneal metastasis (2010)                | Hepatic and pleural metastasis (2019)                                                  | Lymph nodes (2017)<br>Hepatic metastasis (2021) | Peritoneal metastasis (2021)<br>Osseous, ovarian and hepatic metastasis (2021)                                             | Hepatic and osseous metastasis (2020)<br>Pulmonary and medullary metastasis (2021) | Cutaneous, lymphogenic and osseous metastasis (2020-2021)      |
| <b>Therapy of Metastasis</b>     | Letrozole; Carboplatin + Taxol; Letrozole (until 2019) | Avastin                                                                                | Ribociclib + Letrozole; Palbociclib + Letrozole | See “follow-up therapy”                                                                                                    | Letrozole + Goserelin + Abemaciclib                                                | Paclitaxel; Eribulin; Abemaciclib + Letrozole                  |
| <b>Therapy prior to drainage</b> | Palbociclib + Anastrozole (2019)                       | Avastin; Nab-Paclitaxel; Eribulin (2020)                                               | Abemaciclib + Fulvestrant (2020-2021)           | See “follow-up therapy”                                                                                                    | Paclitaxel (2021)                                                                  | Capecitabine (2021)                                            |
| <b>Drainage</b>                  | Ascites (2020)                                         | Pleura (2021)                                                                          | Pleura (2021)                                   | Ascites (2021)                                                                                                             | Pleura (2021)                                                                      | Pleura (2021)                                                  |
| <b>Follow-up therapy</b>         | None, patient did not survive                          | Palbociclib + Letrozole; Vinorelbine + Trastuzumab + Pertuzumab                        | Everolimus + Aromasin; Doxorubicin              | Nab-Paclitaxel + Trastuzumab + Pertuzumab; Fulvestrant + Trastuzumab + Pertuzumab; Abemaciclib + Trastuzumab + Fulvestrant | None, patient did not survive                                                      | Carboplatin + Olaparib; Olaparib                               |
| <b>Additional information</b>    | -                                                      | Hepatic and pleural metastasis (2019): NST infiltration, <i>PIK3CA</i> H1047R mutation | -                                               | Mamma Biopsy (2021): <i>PIK3CA</i> E545K mutation                                                                          | -                                                                                  | NST (2019): <i>BRCA1/2</i> deletion, <i>AKT1</i> E17K mutation |

**Table S2.** Composition of Breast Cancer Medium (BCM). Composition was previously described [24, 27].

| Component                                                        | Final concentration | Company                                         | Catalog number                                      |
|------------------------------------------------------------------|---------------------|-------------------------------------------------|-----------------------------------------------------|
| L-WRN conditioned medium                                         | 50%                 | Home-made                                       | -                                                   |
| Neuregulin 1                                                     | 5 nM                | Peprtech (Cranbury, NJ, USA)                    | 100-03                                              |
| FGF7                                                             | 5 ng/ml             | Peprtech (Cranbury, NJ, USA)                    | 100-19                                              |
| FGF10                                                            | 20 ng/ml            | Peprtech (Cranbury, NJ, USA)                    | 100-26                                              |
| EGF                                                              | 5 ng/ml             | Peprtech (Cranbury, NJ, USA)                    | AF-100-15                                           |
| A83-01                                                           | 500 nM              | Tocris Bioscience (Bristol, UK)                 | 2939                                                |
| Y-27632                                                          | 5 $\mu$ M           | Hölzel Diagnostika Handels GmbH (Köln, Germany) | TMO-T1725-50 mg                                     |
| SB202190                                                         | 500 nM              | Sigma-Aldrich (St. Louis, MO, USA)              | S7067                                               |
| B-27™ supplement                                                 | 1x                  | Thermo Fisher Scientific (Waltham, MA, USA)     | 17504-44                                            |
| Nicotinamide (NIC)                                               | 5 mM                | Sigma-Aldrich (St. Louis, MO, USA)              | NO636                                               |
| N-Acetylcysteine (NAC)                                           | 1.25 mM             | Sigma-Aldrich (St. Louis, MO, USA)              | A9165-5G                                            |
| Primocin                                                         | 50 $\mu$ g/ml       | InvivoGen (San Diego, CA, USA)                  | Ant-pm-1                                            |
| AdvDMEM +++<br>(1% Pen/Strep,<br>1x GlutaMAX™-I,<br>10 mM HEPES) | 1x                  | Thermo Fisher Scientific (Waltham, MA, USA)     | 12634-028;<br>15140-122;<br>35050-038;<br>15630-056 |

**Table S3.** List of inhibitors applied in 3D drug screenings.

| Inhibitor    | Company     | Catalog Number |
|--------------|-------------|----------------|
| Abemaciclib  | Hycultec    | HY-16297A      |
| Afatinib     | Hycultec    | HY-10261       |
| Alpelisib    | Hycultec    | HY-15244       |
| Capivasertib | Selleckchem | S8019          |
| Everolimus   | Selleckchem | S1120          |
| Gemcitabine  | Selleckchem | S1714          |
| Ipatasertib  | Hycultec    | HY-15186       |
| Lapatinib    | Hycultec    | HY-50898       |
| Neratinib    | Hycultec    | HY-32721       |
| Olaparib     | Hycultec    | HY-10162       |
| Paclitaxel   | Sigma       | T7191          |
| Palbociclib  | Hycultec    | HY-50767       |
| Pictilisib   | Selleckchem | S1065          |
| Tucatinib    | Hycultec    | HY-16069       |

**Table S4.** List of antibodies used for IHC stainings.

| Antibody target       | Dilution | Company                  | Catalog number |
|-----------------------|----------|--------------------------|----------------|
| CDH1 (clone NCH-38)   | 1:50     | Agilent Technologies     | M3612          |
| EpCAM (clone Ber-EP4) | 1:50     | Agilent Technologies     | M0804          |
| ER $\alpha$ (F-10)    | 1:50     | Santa Cruz Biotechnology | SC-8002        |
| GATA3 (HG3-31)        | 1:200    | Santa Cruz Biotechnology | SC-268         |
| HER2 (c-erbB-2)       | 1:500    | Agilent Technologies     | A0485          |
| Ki67                  | 1:500    | Abcam                    | AB16667        |
| p53 Protein (DO-7)    | 1:50     | Agilent Technologies     | M700129-2      |
| phospho-AKT (Ser473)  | 1:200    | Cell Signaling           | 4060S          |
| PR (Clone PgR 6369)   | 1:50     | Agilent Technologies     | M356929-2      |

**Table S5.** Primers used for the amplification of hotspot mutations and for sequencing. All primers were purchased from Sigma-Aldrich. \*Reverse primer for *PIK3CA* E542 and E545 mutation was designed based on a previous publication, to eliminate the amplification of a pseudogene [29].

| Primer                                                                       | Sequence (5' $\rightarrow$ 3') | Application |
|------------------------------------------------------------------------------|--------------------------------|-------------|
| Forward primer for <i>PIK3CA</i> mutation (exon 9 covering E542 and E545)    | AATCTGGTCTTGTGTTGGCT           | PCR         |
| Reverse primer for <i>PIK3CA</i> mutation * (exon 9 covering E542 and E545)  | CCATTTTAGCACTTACCTGTGAC        | PCR         |
| Sequencing primer for <i>PIK3CA</i> mutation (exon 9 covering E542 and E545) | ATCATCTGTGAATCCAGAGGGGA        | Sequencing  |
| Forward primer for <i>PIK3CA</i> mutation (exon 20 covering H1047)           | TGGTAAGAGAAGTGAGAGAGGA         | PCR         |
| Reverse primer for <i>PIK3CA</i> mutation (exon 20 covering H1047)           | CAGCCTTTGTTGTGTCCACATT         | PCR         |
| Sequencing primer for <i>PIK3CA</i> mutation (exon 20 covering H1047)        | CGACAGCATGCCAATCTCTTC          | Sequencing  |
| Forward primer for <i>AKT</i> mutation (exon 1 covering E17)                 | CTGGTTGATTGGGGAATGCT           | PCR         |
| Reverse primer for <i>AKT</i> mutation (exon 1 covering E17)                 | AAATCTGAATCCCGAGAGGC           | PCR         |
| Sequencing primer for <i>AKT</i> mutation (exon 1 covering E17)              | TCGCTGGCCCTAAGAAACAG           | Sequencing  |

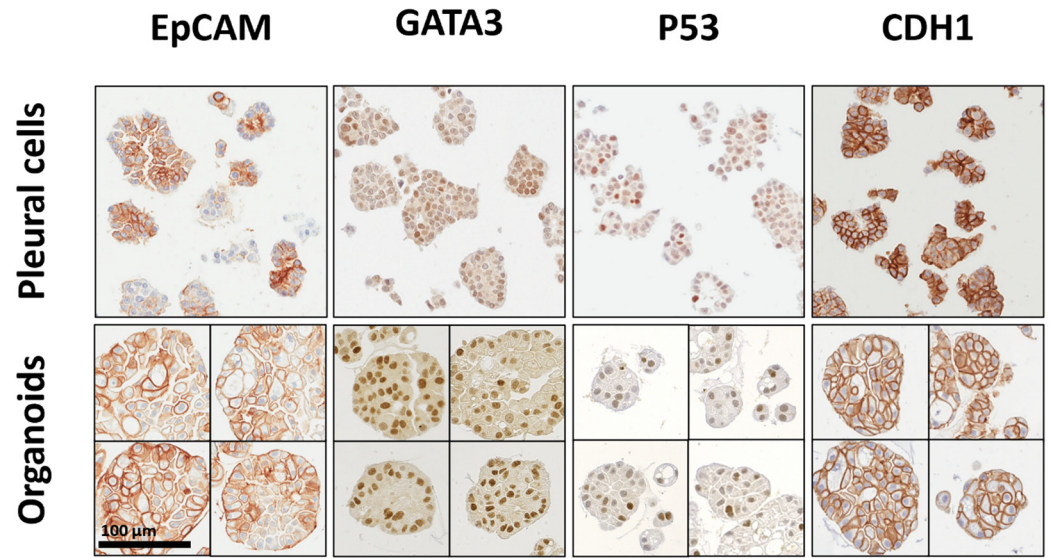

**Figure S1.** Histological characterization of pleural BC cells and organoids derived from pleural ef-fusion. IHC staining of MBC-PDO #03 with antibodies against EpCAM, GATA3, P53, and CDH1. The expression pattern of pleural cells is retained in organoids (P3). Scale bar: 100  $\mu$ m.

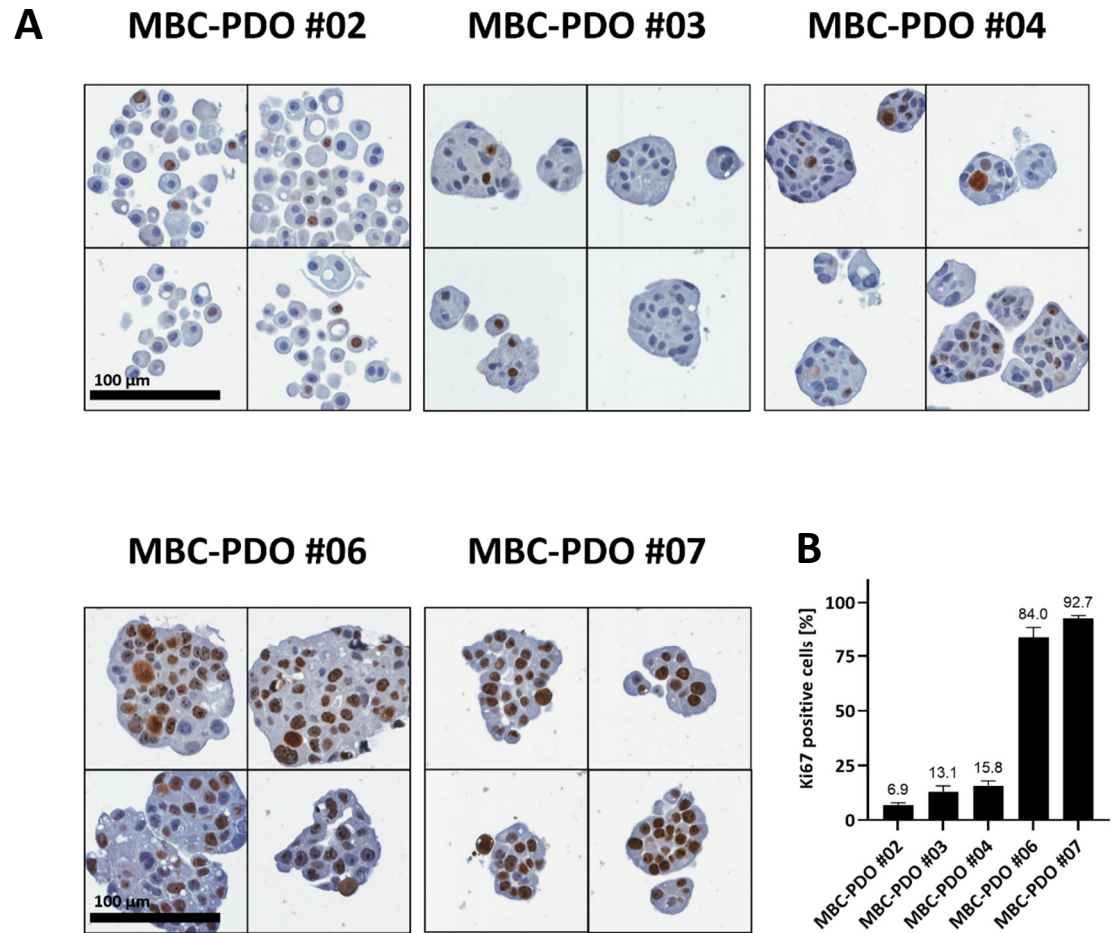

**Figure S2.** IHC staining of the proliferation marker Ki67 in organoids. **(A)** IHC stainings of FFPE samples from organoids. Brown nuclei indicate positivity. Scale bar: 100  $\mu$ m. **(B)** Quantification of Ki67 positive cells. Ki67-stainings were quantified by counting 150 cells of each organoid line and determining the ratio of Ki67-positive cells. Quantification was done in triplicates.

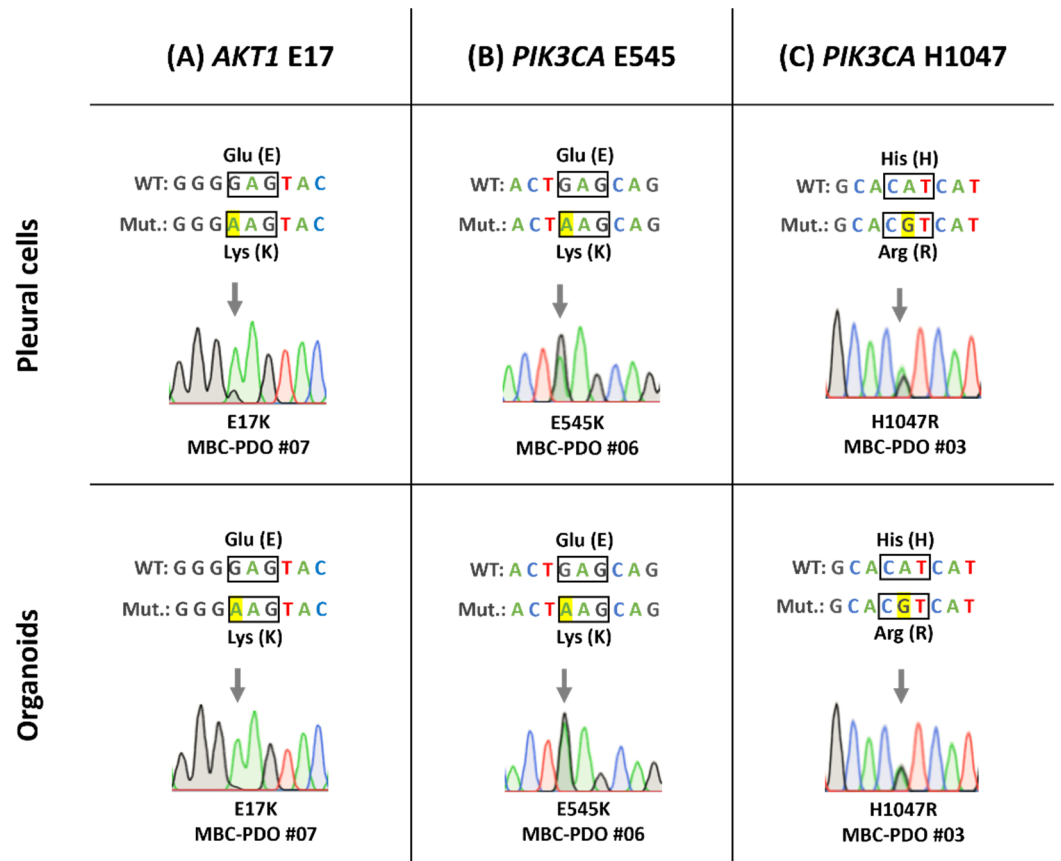

**Figure S3.** Examples of mutations in *AKT1* and *PIK3CA*. Mutation analysis of three common hotspots in *AKT1* and *PIK3CA* genes. PCR-amplified DNA samples were sequenced by Sanger sequencing and depicted in chromatograms. Shown are wild type (WT) sequences and the sequence of mutated samples. DNA bases are represented by the following colors: guanine (G) in black, cytosine (C) in blue, adenine (A) in green, thymine (T) in red. **(A)** Homozygous mutation of *AKT1* E17K in MBC-PDO #07 pleural cells and organoids. **(B)** Heterozygous mutation of *PIK3CA* E545K in MBC-PDO #06 pleural cells and organoids. **(C)** Heterozygous mutation of *PIK3CA* H1047R in MBC-PDO #03 pleural cells and organoids.

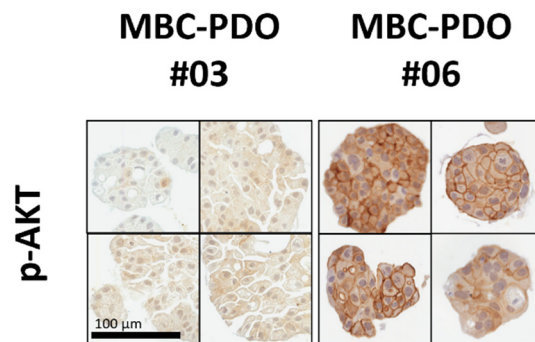

**Figure S4.** IHC-staining of p-AKT. MBC-PDO #03 and #06 organoids were stained with an antibody against p-AKT to demonstrate the activity of the PI3K-AKT signaling pathway. Cytoplasmic expression of p-AKT was observed in MBC-PDO #06. Scale bar: 100 µm.
